# Supplementary material for: Nanoassemblies of heptamethine cyanine dye-initiated poly(amino acid) enhance ROS generation for effective antitumour phototherapy
Source: Royal Society of Chemistry journal article supplement (doi:10.1039/d3nh00584d), 2024-01-01
Supplement: d3nh00584d1.pdf [file d3nh00584d1.pdf]

## Supporting information

### **Nanoassemblies of Heptamethine Cyanine Dye-Initiated Poly(Amino Acid) Enhance ROS Generation for Effective Antitumour Phototherapy**

*Pengwen Chen<sup>1</sup>, Shangwei Li<sup>1</sup>, Zhining Xu<sup>2,3</sup>, Horacio Cabral<sup>1\*</sup>*

<sup>1</sup> Department of Bioengineering, Graduate School of Engineering, The University of Tokyo, Bunkyo-ku, Tokyo, 113-8656 Japan

<sup>2</sup> Polymer Chemistry and Physics Research Group, HUN-REN Research Centre for Natural Sciences, H-1117 Budapest, Hungary

<sup>3</sup> Faculty of Science, Eötvös Loránd University, H-1117, Budapest, Hungary

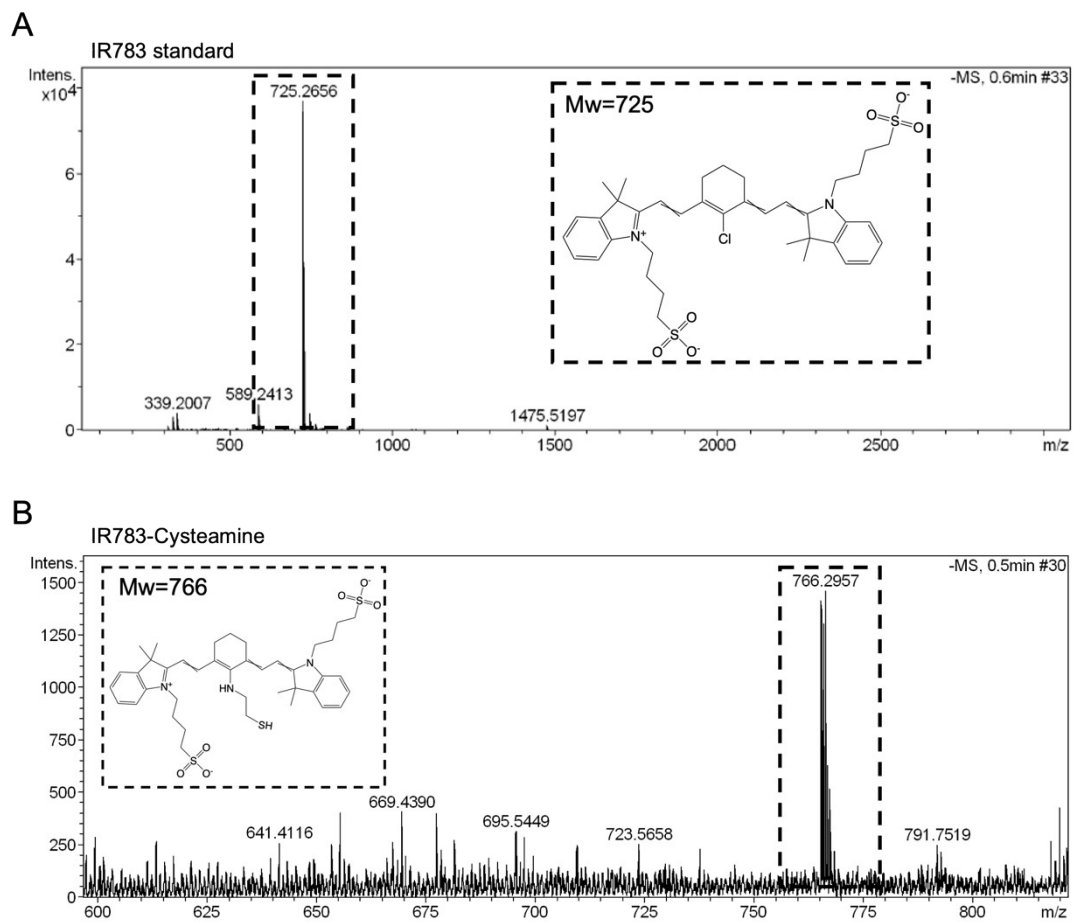

**Figure S1.** Mass spectra of IR783 (A) and IR783-cysteamine (B)

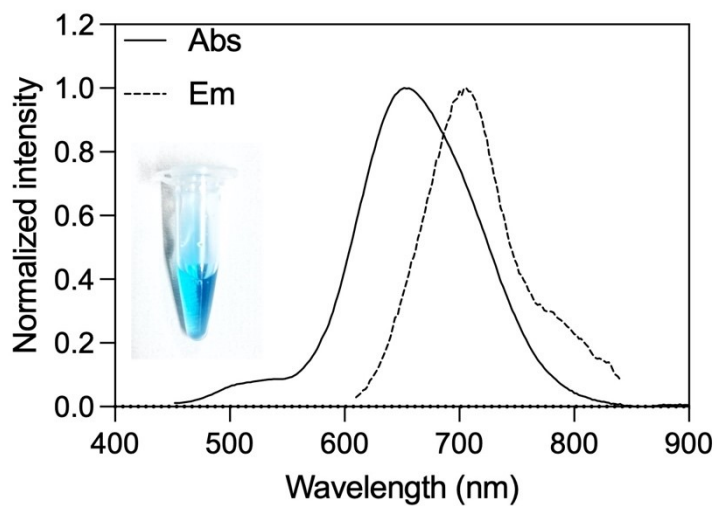

**Figure S2.** Absorbance and emission (Ex = 650 nm) spectra of IR783-cysteamine in water.

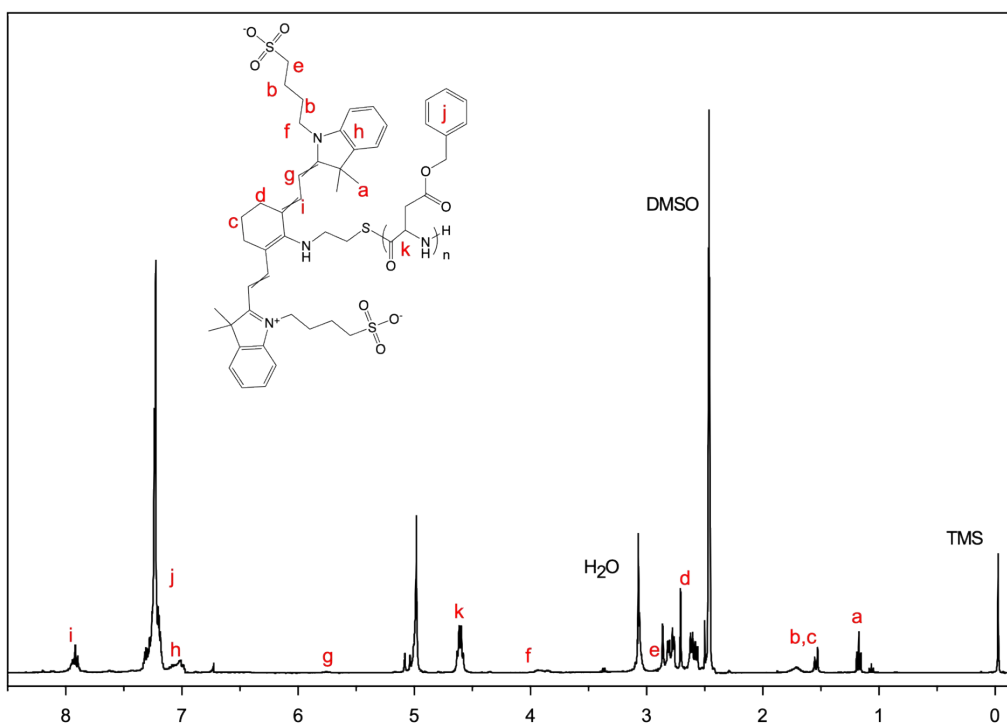

**Figure S3.** <sup>1</sup>H-NMR spectrum of IR-pBLA. The successful polymerization of BLA groups was confirmed by the appearance of the peak corresponding to the -CH- on the backbone of pBLA block ( $\delta \approx 4.6$  ppm, peak k). The number of BLA groups on one molecule was determined by comparing the peaks corresponding to -CH- on IR783 moiety ( $\delta \approx 7.9$  ppm, peak i) with peak k and calculated to be 17.

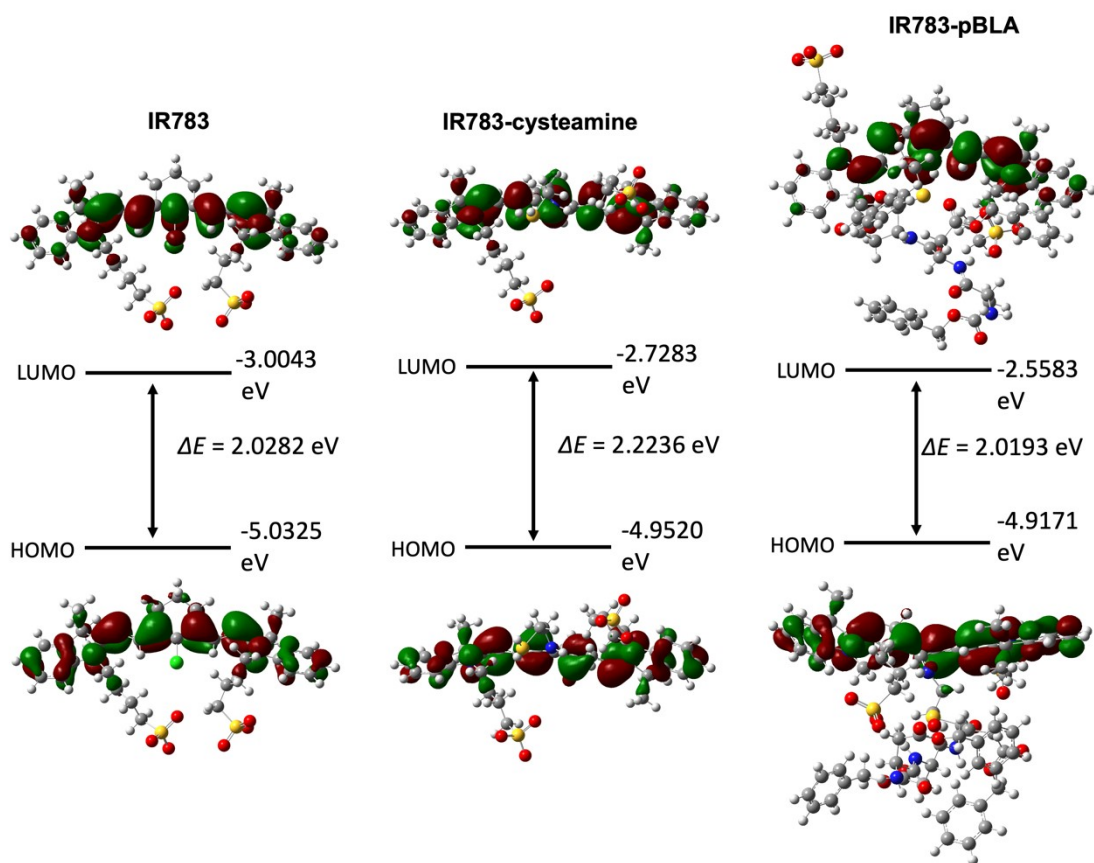

**Figure S4.** Theoretically predicted LUMO and HOMO distributions of the IR783 derivatives. The energy levels and band gaps were marked.

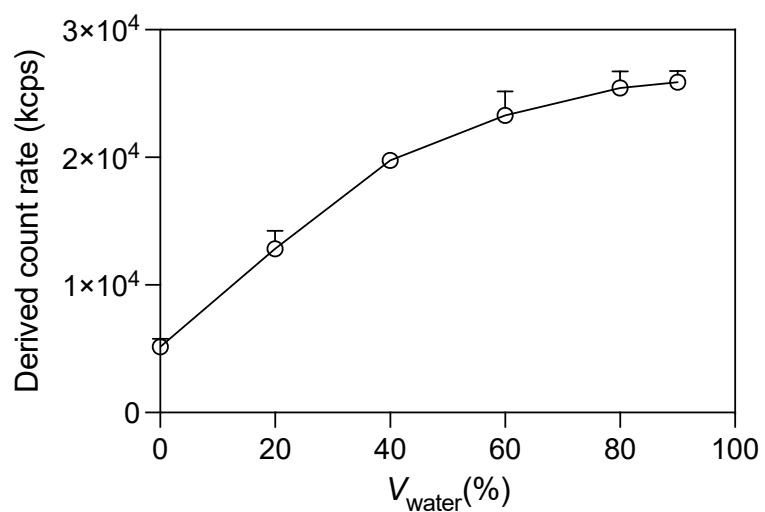

**Figure S5.** Light scattering intensity (measured by DLS) of IR783-pBLA dispersed in DMSO-water mixture with different water fraction. Data shown as mean  $\pm$  S.D.,  $n = 3$ .

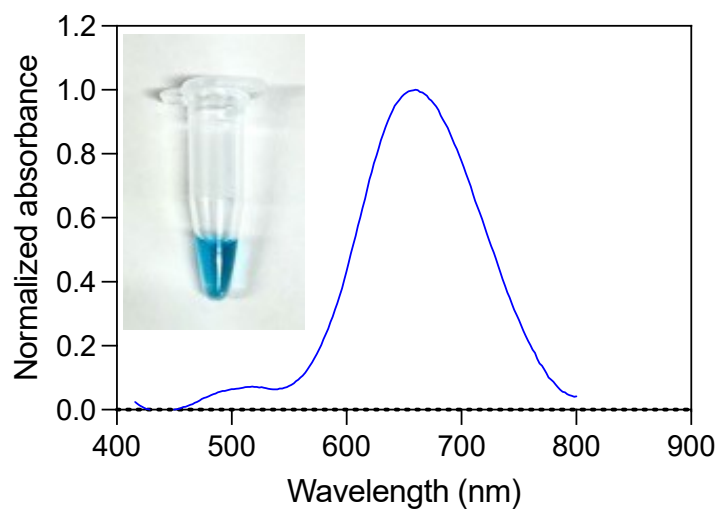

**Figure S6.** Representative absorbance spectrum and photography of IR-PA dispersed in water.

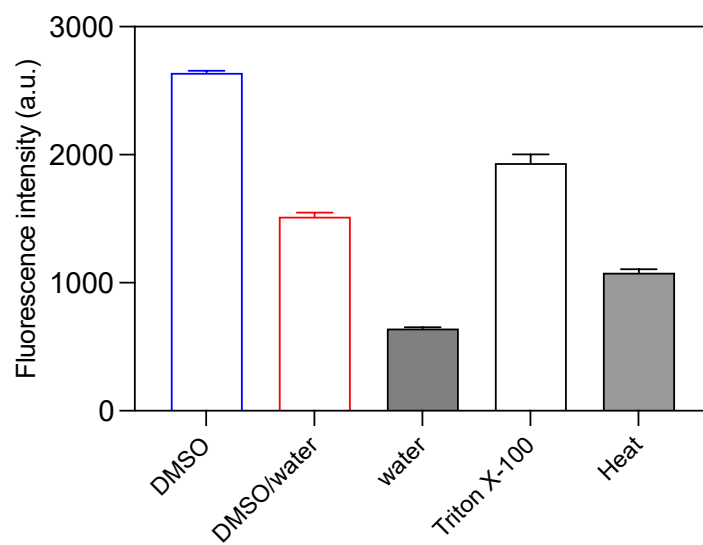

**Figure S7.** Fluorescence emission intensity (Ex 650/Em 770 nm) of IR-PA under different condition. Data shown as the mean  $\pm$  S.D.;  $n = 3$ .



**Table S1.** Optical properties of IR783-cysteamine and IR-PA in water

| Sample               | absorption<br>$\lambda_{ab}$ (nm) | emission<br>$\lambda_{em}$ (nm) | Stokes<br>Shift (nm) | $\epsilon$<br>( $\times 10^5$ ) | $\Phi$ |
|----------------------|-----------------------------------|---------------------------------|----------------------|---------------------------------|--------|
| Cy5                  | 651                               | 670                             | 19                   | 2.3                             | 0.27   |
| IR783-<br>cysteamine | 652                               | 706                             | 54                   | 1.55                            | 0.11   |
| IR-PA                | 660                               | 770                             | 110                  | 1.89                            | 0.05   |

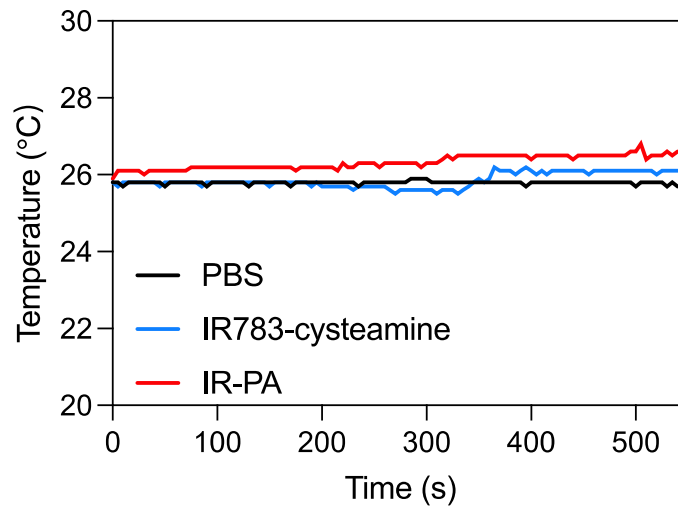

**Figure S8.** Temperature change of IR783-cysteamine and IR-PA water solution during irradiation with 633 nm laser.

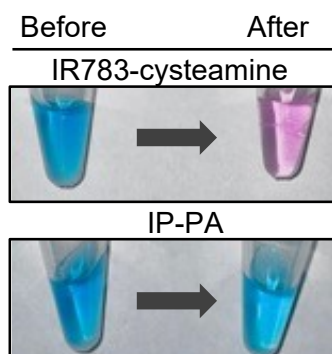

**Figure S9.** Colour change of IR783-cysteamine and IR-PA water solution after irradiation by 633 nm laser for 30 min.

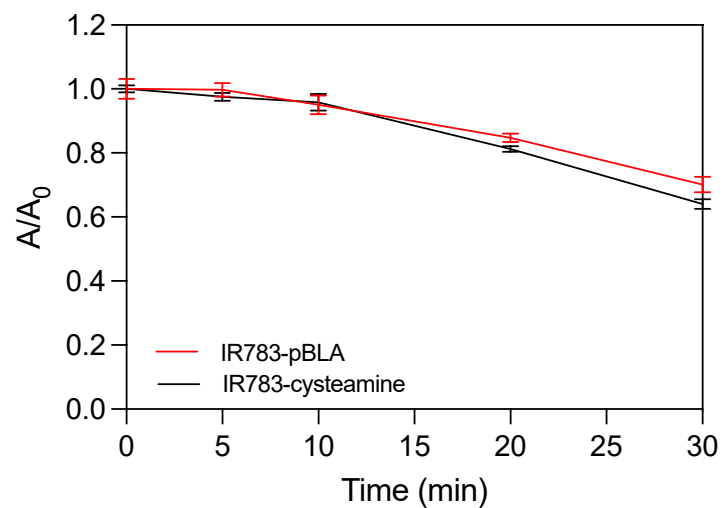

**Figure S10.** Photostability of IR783-pBLA and IR783-cysteamine in DMSO after irradiation by 633 nm laser. Data shown as mean  $\pm$  S.D.,  $n = 3$ .

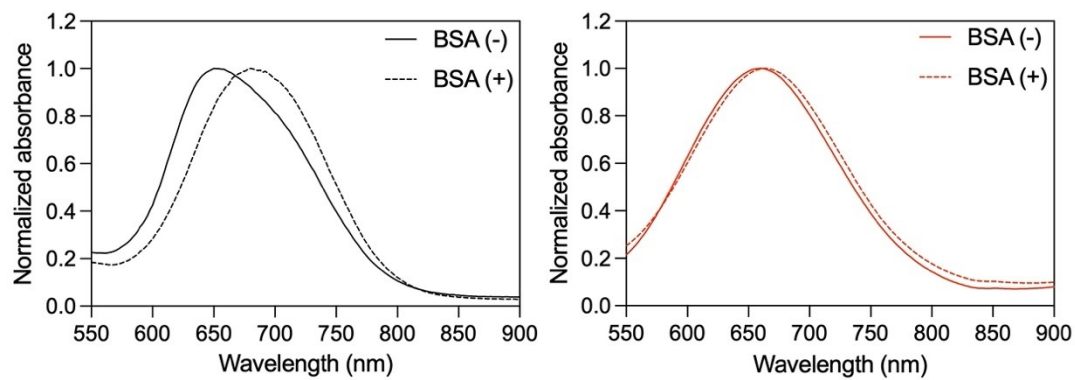

**Figure S11.** UV-vis absorbance spectra of IR783-cysteamine (left panel) and IR-PA (right panel) in aqueous buffer with or without BSA.

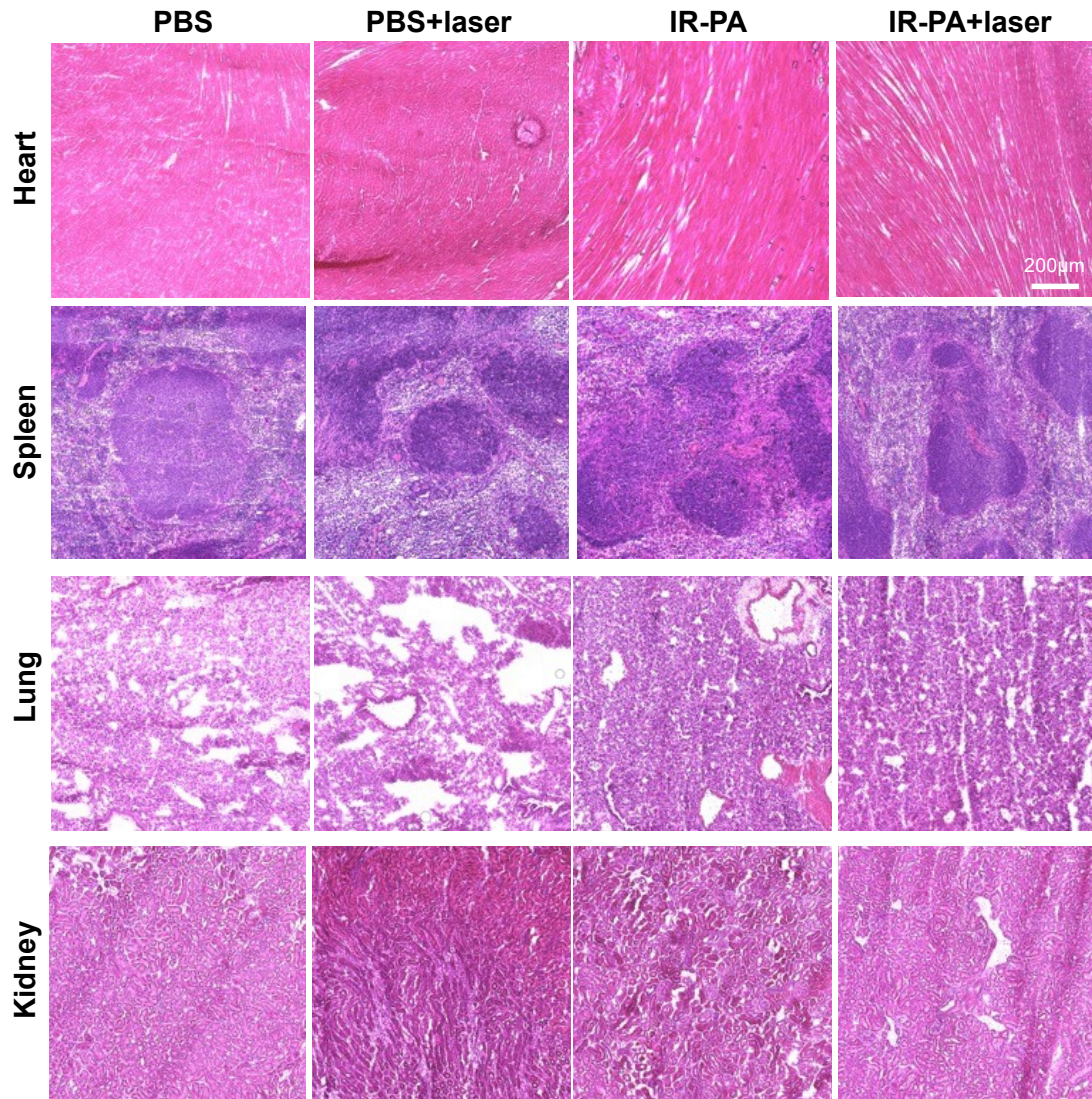

**Figure S12.** Representative H&E staining of organ sections after treatment. Scale bar = 200  $\mu$ m.
